# Supplementary material
Source: PubMed Central journal article supplement (PMC6800321)
Supplement: pnas.1902376116.sapp.pdf [file pnas.1902376116.sapp.pdf]

1 **SUPPLEMENTARY INFORMATION**

2 **Grey Matter Age Prediction as a Biomarker for Risk of Dementia**

3 **Content:**

- 4 • **Supplementary Methods 1:** Study Population
- 5 • **Supplementary Methods 2:** Measurements of characteristics
- 6 • **Supplementary Methods 3:** Deep learning and convolutional neural networks
- 7 • **Supplementary Methods 4:** Network training
- 8 • **Supplementary Methods 5:** Attention mapping
- 9 • **Supplementary Text 1:** Sex covariate effect on CNN model performance
- 10 • **Supplementary Text 2:** Important regions attention map
- 11 • **Supplementary Table 1.** Characteristics of subjects with the lowest quintile age gap values  
12 compared to the highest quintile age gap values.
- 13 • **Supplementary Figure 1:** Flowchart showing the number of excluded participants per  
14 category.
- 15 • **Supplementary Figure 2:** Graphical representation of the network architecture.
- 16 • **Supplementary Figure 3:** The probability density of the gap value for male and female  
17 subjects.
- 18 • **Supplementary Figure 4:** Effect of adding sex as a covariate to the model on the gap value  
19 distribution.
- 20 • **Supplementary Figure 5.** Grad-CAM attention map intensity per voxel overlaid on a brain  
21 template (thresholded).

22 • **Supplementary Figure 6.** Grad-CAM attention map intensity per voxel overlaid on a brain  
23 template.

24 • **Supplementary Figure 7.** Correlation between brain pathology associated features and the  
25 age gap.

26 •

27 **\*CORRESPONDENCE:**

28 G.V. Roshchupkin PhD, Department of Epidemiology, Department of Medical Informatics,  
29 Department of Radiology and Nuclear Medicine, Erasmus Medical Center

30 Dr. Molewaterplein 50, 3015 GE, Rotterdam, the Netherlands.

31 **E-mail:** [g.roshchupkin@erasmusmc.nl](mailto:g.roshchupkin@erasmusmc.nl)

32 *Supplementary methods 1: Study Population*

33 The cohort started in January 1990 (n=7983) and was extended in February 2000 (n=3011) and  
34 February 2006 (n=3932). Follow-up examinations take place every 3 to 4 years. MRI was  
35 implemented in 2005, and 5912 persons scanned until 2015 were eligible for this study. We  
36 excluded individuals with incomplete acquisitions, scans with artifacts hampering automated  
37 processing, participants with MRI-defined cortical infarcts and participants with dementia or  
38 stroke at the time of scanning (**SI Appendix Fig. 1**). This resulted in 5656 subjects to be  
39 included in this study. The Rotterdam Study has been approved by the Medical Ethics  
40 Committee of the Erasmus MC and by the Ministry of Health, Welfare and Sport of the  
41 Netherlands, implementing the Wet Bevolkingsonderzoek ERGO (Population Studies Act:  
42 Rotterdam Study). All participants provided written informed consent to participate in the study  
43 and to obtain information from their treating physicians. The scan protocol of the Rotterdam  
44 Study is carefully balanced between the restrictions of time, costs and inconvenience for the  
45 participants and the relevance and quality of the acquired imaging data, to ensure participant  
46 compliance and reproducible image quality (to reduce motion artefacts). Each MRI scan that is  
47 acquired is visually examined by a research physician in the Rotterdam Scan Study.

48 *Supplementary methods 2: Measurements of characteristics*

49 All participants were monitored for dementia at baseline and following visits to the study center  
50 using the Mini-Mental State Examination (MMSE) and the Geriatric Mental State (GMS)  
51 organic level. Further investigation was initiated for participants who scored lower than 26 for  
52 their MMSE or above 0 for their GMS<sup>1</sup>. Additionally, the entire cohort was continuously  
53 checked for dementia through electronic linkage between the study center and medical records  
54 from general practitioners and the regional institute for outpatient mental health care. Available  
55 information on cognitive testing and clinical neuroimaging was used when required for diagnosis  
56 of dementia subtype. Final diagnosis was established by a consensus panel led by a consultant  
57 neurologist, according to a standard criteria for dementia (using the Third Revised Edition of the  
58 Diagnostic and Statistical Manual of Mental Disorders (DSM-III-R))<sup>2,3</sup>. Until January 1<sup>st</sup> 2016,  
59 92% of the potential person-time follow-up was complete. Participants were censored at date of  
60 dementia diagnosis, death or loss to follow-up, or at January 1st 2016, whichever came first. Of  
61 5496 subjects included in this analysis, 159 developed dementia within 10 years of follow-up  
62 (mean follow-up time 4.34±2.25 years).

63 Mild cognitive impairment (MCI) was assessed in individuals over the age of 60 years, for which  
64 both subjective and objective cognitive deficits were required. An objective cognitive deficit was  
65 based on a cut-off of 1.5 standard deviations below the Rotterdam Study age- and education-  
66 specific means in three cognitive domains, i.e. the memory, information processing speed and  
67 executive functioning domain. Subjective cognitive deficits were defined as having answered yes  
68 to any of six questions regarding difficulties in memory (difficulties finding words, or  
69 remembering plans) or daily functioning (difficulties managing finances, getting dressed, or  
70 using the phone).

71 Systolic and diastolic blood pressure was measured twice in the right arm in sitting position after  
72 five minutes of rest, of which the average was used. Body mass index (BMI) was defined as  
73 weight in kilograms (kg) divided by height in meters squared ( $m^2$ ). Participants were asked by  
74 interview whether they were a current or past smoker, which was used to define their smoking  
75 status. Glucose, total cholesterol and HDL cholesterol were measured in blood of the fasting  
76 state.

77

78 *Supplementary methods 3: Deep learning and convolutional neural networks*

79 Deep learning techniques require a set of input and respective output to find and optimize a non-  
80 linear relation between the two. By providing data to a set of algorithms, the method is able to  
81 train a by the user designed model. Generally, the user designs the model architecture by  
82 selecting the model components. Subsequently, the machine learning method iteratively adjusts  
83 the model parameters according to that iteration's trained model performance, to create an  
84 optimized model using backpropagation by supervised or unsupervised learning<sup>4,5</sup>. By letting the  
85 model itself choose which relevant features to extract from the input, deep learning facilitates the  
86 model to freely search the input-space and find the most important, possibly new, input features.

87 Convolutional neural networks (CNNs) are a subset amongst deep learning techniques. They  
88 allow multi-dimensional input images and inspect these inputs by scanning them for relevant  
89 information<sup>6,7</sup>. Deep learning and CNN models have been rising in popularity and have been  
90 actively studied in recent years, reaching state-of-the-art performances in many applications  
91 amongst which medical imaging<sup>8-10</sup>.

92 CNNs regard an image as a field of numerical values, view small portions of this image  
93 (receptive field) and perform multiplications with a weight-matrix (filter) to extract certain  
94 information (feature) from this portion. By inspecting the entire image using this filter in a grid-  
95 wise manner, the filter extracts specific information which is then saved to a new matrix or  
96 image (feature map). Repeating this process for the resulting feature maps, the network  
97 iteratively refines or searches for more information inside of the image that is relevant to the  
98 output.

99 These convolutional layers (CONV layers) are then typically combined with a variety of  
100 different techniques and algorithms that allow the network to appropriately extract the  
101 information from the input. Commonly used techniques are rectified linear units activation  
102 (ReLU), max-pooling layers (MP), fully connected layers (FC), batch normalization and  
103 dropout<sup>7,10</sup>.

104

105 *Supplementary methods 4: Network training*

106 The CNN has been trained using the data from the training set of 3688 subjects. Here, over- and  
107 undersampling had been applied to the training set. Thus, effectively data of 3688 subjects was  
108 used out of 3848 available subjects available for the training set, to distribute the samples more  
109 evenly over the age range of the population ( $N_{\text{img,train\_balanced}}=8060$  images, mean age  
110  $68.52\pm 13.71\text{sd}$ ). To avoid overfitting on the training set and to improve overall model  
111 performance, data augmentation was also applied during training<sup>11</sup>. Data augmentation included  
112 random small translations and mirroring in planes. We also used follow-up MRI scans of each  
113 subject as a ‘natural data augmentation’ technique.

114 The best model was selected based on its performance on the validation set. Here the  
115 performance is measured as the model accuracy based on the root mean squared error (RMSE) of  
116 the gap, as RMSE penalizes outliers more than MAE.



117 *Supplementary methods 5: Attention mapping*

118 Attention map intensity values were normalized to range 0-1, where 1 indicates the value for  
119 areas most associated with the network's decision. We expanded the Grad-CAM visualization  
120 technique to a 3-dimensional space.

121 Attention maps were computed for every individual. Since all brain images were registered to the  
122 same template space, a global average voxel-wise attention map could be made over attention  
123 maps of all subjects to obtain a global attention map for the age prediction network.

124 We computed the change in attention map over age per voxel, to investigate the change in  
125 regions predictive for brain age between age groups. To this end, for each voxel, a linear  
126 regression from age to attention map value was performed, resulting in a line of which the slope  
127 represents the increase in attention map value with age for the given voxel

128 *Supplementary text 1: Sex covariate effect on CNN model performance*

129 We can consider a split evaluation between male and female subjects. **Supplementary Figure 3**  
130 shows the network found no significant difference between the two groups ( $p=0.34$ ). By  
131 including sex as a covariate, the covariate can reduce the difference in resulting age predictions  
132 between male and female subjects.

133 The trained model was able to reduce prediction error and correct for male and female biases  
134 observed in the image by the model. By including the additional input of sex, the model is able to  
135 prevent over- and under prediction for male and female ages, respectively, as shown in  
136 **Supplementary Figure 4**. Here we present the performance in gap on male and female subjects,  
137 both early adapted models were trained under the same training settings and used the exact same  
138 training and validation sample sets. The model that includes the additional input of the subject's  
139 respective sex, was able to reduce the overall gap between male and female subjects to be  
140 insignificant ( $p\text{-value}=0.23$ ). This also brought the mean gap for males and females closer to zero  
141 (one-sample t-test:  $p_{\text{male}}=0.88$  and  $p_{\text{female}}=0.05$ ).

142 Given that the sex as covariates improved the model performance, we hypothesised that brain  
143 age prediction gap might have different predictive value for males and females. We did stratified  
144 analysis and have not found any differences between males (HR=1.16, 95% CI 1.09-1.24) and  
145 females (HR=1.14, 95% CI 1.09-1.20)

146

147 *Supplementary text 2: Important regions attention map*

148 Although aging affects the entire GM volume in the brain, as shown in **Supplementary Figure**  
149 **5**, significant negative association between GM volume and age have been reported for several  
150 specific brain regions, i.e. a reduction in GM volume with age<sup>12,13</sup>. According to literature<sup>12,13</sup> the  
151 insula, superior temporal areas and multiple gyri have shown significant age-related GM volume  
152 differences. However, due to the large size of most of these regions often only parts of these  
153 region were highlighted by the network. Interestingly, brain structures affected by age with  
154 higher p-value in literature<sup>12,13</sup>, were also more highlighted by the network, e.g.: caudate nucleus,  
155 amygdala, hippocampus and thalamus.

156

157 *Supplementary references:*

- 158 1. Mutlu U, Colijn JM, Ikram MA, et al. Association of Retinal Neurodegeneration on  
159 Optical Coherence Tomography With Dementia. *JAMA Neurol.* 2018:1-8.  
160 doi:10.1001/jamaneurol.2018.1563
- 161 2. McKhann G, Drachman D, Folstein M, Katzman R, Price D, Stadlan EM. Clinical  
162 diagnosis of Alzheimer's disease. *Neurology.* 1984;34(7):939.
- 163 3. Román G, Tatemichi T, Erkinjuntti T, et al. Vascular dementia: diagnostic criteria for  
164 research studies. *Neurology.* 1993;43(2):250-260. doi:http://dx.doi.org/10.1212/WNL.43.  
165 2.250
- 166 4. Sathya R, Abraham A. Comparison of Supervised and Unsupervised Learning Algorithms  
167 for Pattern Classification. *Int J Adv Res Artif Intell.* 2013;2(2):34-38.  
168 doi:10.14569/IJARAI.2013.020206
- 169 5. Xinghuo Yu, M. Onder Efe and OK. A General Backpropagation Algorithm for  
170 Feedforward Neural Networks Learning. *IEEE Trans Neural Networks.* 2002;13(1):251-  
171 254.
- 172 6. LeCun Y, Bottou L, Bengio Y, Haffner P. Gradient-based learning applied to document  
173 recognition. *Proc IEEE.* 1998;86(11):2278-2323. doi:10.1109/5.726791
- 174 7. Krizhevsky A, Sutskever I, Hinton GE. ImageNet Classification with Deep Convolutional  
175 Neural Networks. *Adv Neural Inf Process Syst.* 2012:1-9.  
176 doi:http://dx.doi.org/10.1016/j.protcy.2014.09.007
- 177 8. Xue-Wen Chen, Xiaotong Lin. Big Data Deep Learning: Challenges and Perspectives.

178 *IEEE Access*. 2014;2:514-525. doi:10.1109/ACCESS.2014.2325029

179 9. Işin A, Direkoğlu C, Şah M. Review of MRI-based Brain Tumor Image Segmentation  
180 Using Deep Learning Methods. *Procedia Comput Sci*. 2016;102(August):317-324.  
181 doi:10.1016/j.procs.2016.09.407

182 10. Ker J, Wang L, Rao J, Lim T. Deep Learning Applications in Medical Image Analysis.  
183 *IEEE Access*. 2018:1-1. doi:10.1109/ACCESS.2017.2788044

184 11. Perez L, Wang J. The Effectiveness of Data Augmentation in Image Classification using  
185 Deep Learning. 2017.

186 12. Manard M, Bahri MA, Salmon E, Collette F. Relationship between grey matter integrity  
187 and executive abilities in aging. *Brain Res*. 2016;1642:562-580.  
188 doi:10.1016/j.brainres.2016.04.045

189 13. Matsuda H. Voxel-based Morphometry of Brain MRI in Normal Aging and Alzheimer's  
190 Disease. *Aging Dis*. 2013;4(1):29-37.

191

192 **Supplementary Table 1.** Characteristics of subjects with the 5-year age-stratified lowest  
 193 quintile age gap values compared to the 5-year age-stratified highest quintile age gap  
 194 values, and correlation estimates between these characteristics and the age gap in the full  
 195 sample.

| Characteristic                       | Value lowest quintile<br>(n=340)* | Value highest quintile<br>(n=350)* | p-value | Correlation estimates<br>(95% CI) |
|--------------------------------------|-----------------------------------|------------------------------------|---------|-----------------------------------|
| Age gap (years)                      | -5.7 ± 3.9                        | 6.9 ± 4.5                          | <0.001  | -                                 |
| Grey matter volume (mL)              | 605.0 ± 56.9                      | 577.6 ± 56.2                       | <0.001  | 0.11 (0.07;0.16)                  |
| Systolic blood pressure (mmHg)       | 138.9 ± 21.6                      | 143.1 ± 21.0                       | 0.009   | -0.19 (-0.24;-0.15)               |
| Mild cognitive impairment, n (%)     | 15 (4.4)                          | 31 (8.9)                           | 0.013   | 0.07 (0.01;0.13)                  |
| Diastolic blood pressure (mmHg)      | 82.1 ± 10.8                       | 84.1 ± 11.1                        | 0.014   | 0.06 (0.01;0.11)                  |
| Fasting glucose level (mmol/L)       | 5.5 ± 1.2                         | 5.7 ± 1.1                          | 0.021   | -0.01 (-0.06;0.03)                |
| Current or past smoker, n (%)        | 102 (30.0)                        | 130 (37.1)                         | 0.027   | 0.34 (0.30;0.38)                  |
| Body mass index (kg/m <sup>2</sup> ) | 27.2 ± 3.9                        | 27.8 ± 4.5                         | 0.043   | 0.08 (0.04;0.13)                  |
| Mini-Mental State Examination score  | 28.0 ± 1.8                        | 27.7 ± 2.1                         | 0.095   | 0.07 (0.02;0.12)                  |
| Total cholesterol (mmol/L)           | 5.6 ± 1.0                         | 5.5 ± 1.1                          | 0.323   | 0.00 (-0.05;0.05)                 |
| APOEε4 carrier, n (%)                | 92 (27.1)                         | 103 (29.4)                         | 0.418   | 0.01 (-0.04;0.06)                 |
| Female, n (%)                        | 187 (55.0)                        | 203 (58.0)                         | 0.428   | 0.02 (-0.03;0.07)                 |
| HDL cholesterol (mmol/L)             | 1.4 ± 0.4                         | 1.5 ± 0.4                          | 0.549   | 0.00 (-0.04;0.05)                 |
| Age (years)                          | 65.5 ± 10.8                       | 65.3 ± 11.0                        | 0.771   | -0.58 (-0.61;-0.55)               |
| Years of education                   | 12.4 ± 3.8                        | 12.3 ± 4.0                         | 0.829   | 0.10 (0.05;0.14)                  |
| Intracranial volume (mL)             | 1465.8 ± 163.2                    | 1466.3 ± 164.1                     | 0.971   | 0.10 (0.06;0.15)                  |

\*Values are presented in mean ± SD unless stated otherwise.

Abbreviations: confidence interval (CI); number of participants (n); standard deviation (SD).

196

197

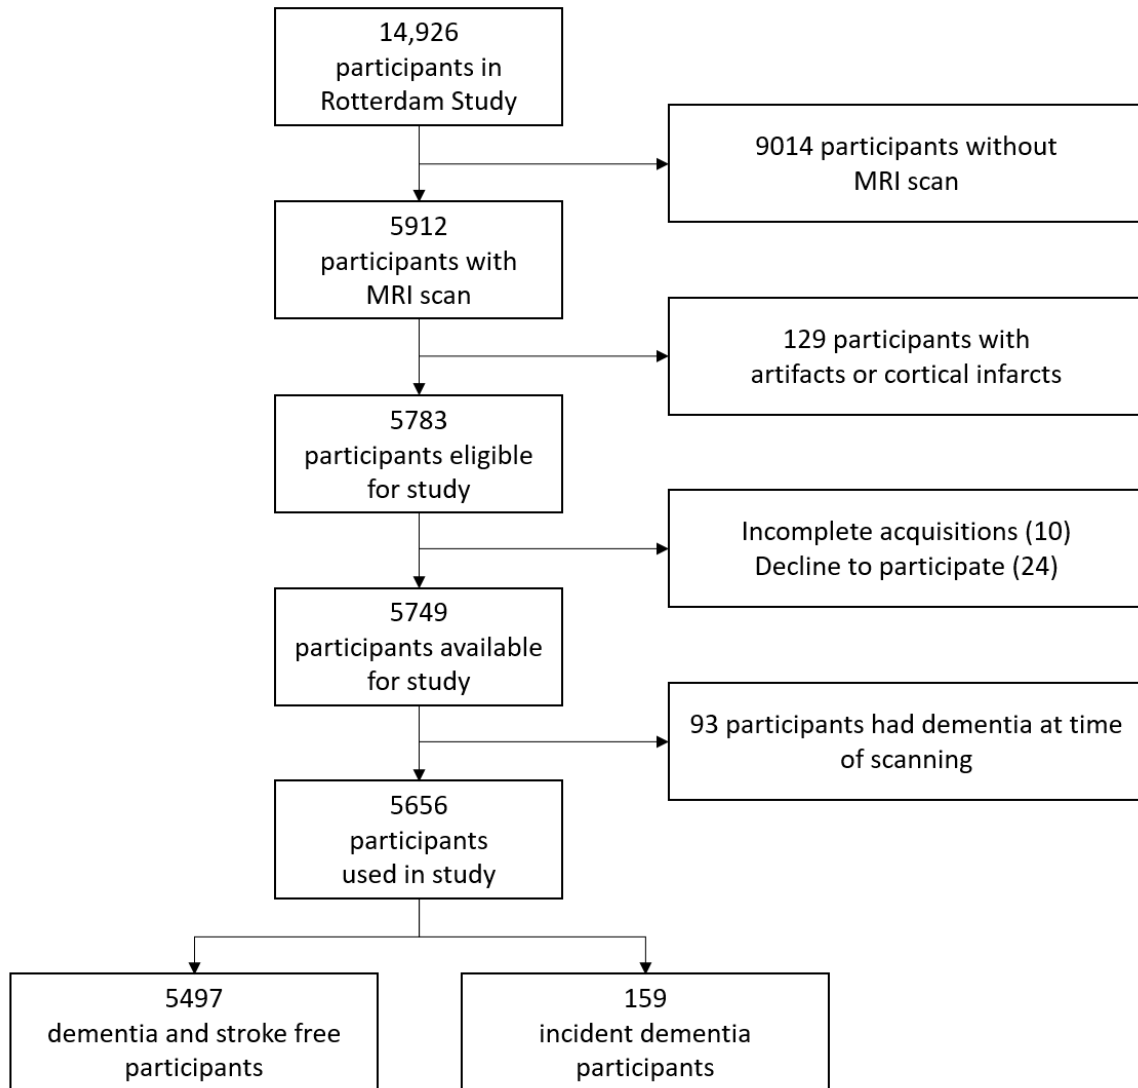

198

199 **Supplementary Figure 1.** Flowchart showing the number of excluded participants per category.

200

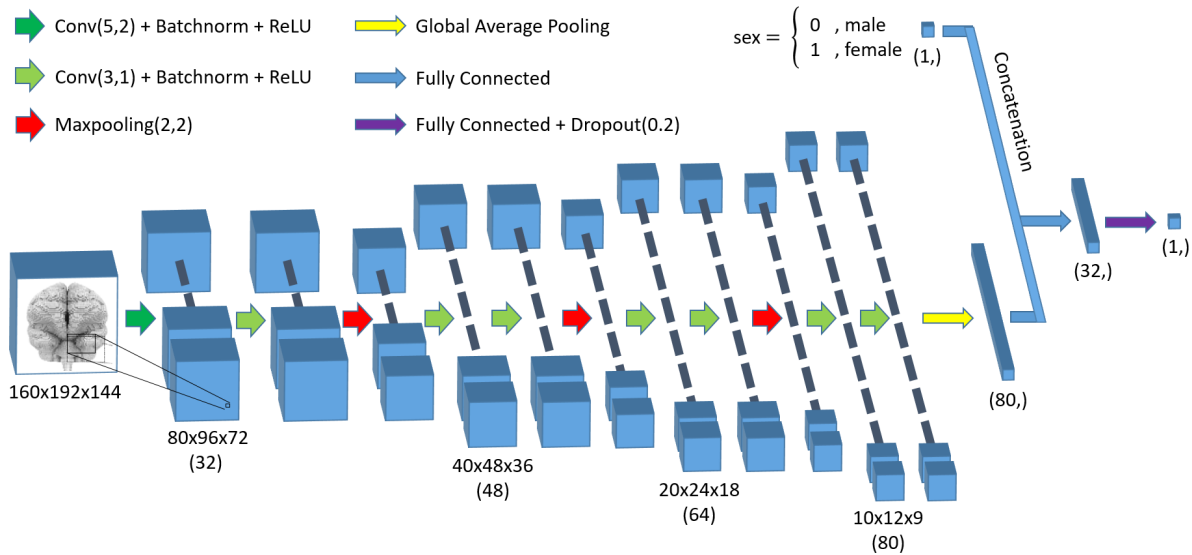

201

202 **Supplementary Figure 2.** Graphical representation of the network architecture. The overall

203 approach can be seen as four convolutional blocks ending on a pooling layer, which halves

204 feature map dimensions. Hereafter, global average pooling extracts the final feature maps to a

205 one-dimensional array of a single value per feature map. Fully connected layers are used to

206 propagate to a single regression output. *Abbreviations:* kxkxk convolutional layer, with strides of

207 sxsxs (CONV(k,s)); kxkxk max-pooling layer, with strides of sxsxs (Maxpooling(k,s)); batch

208 normalization (Batchnorm); rectified linear unit (ReLU); dropout with probability p

209 (Dropout(p)).

210



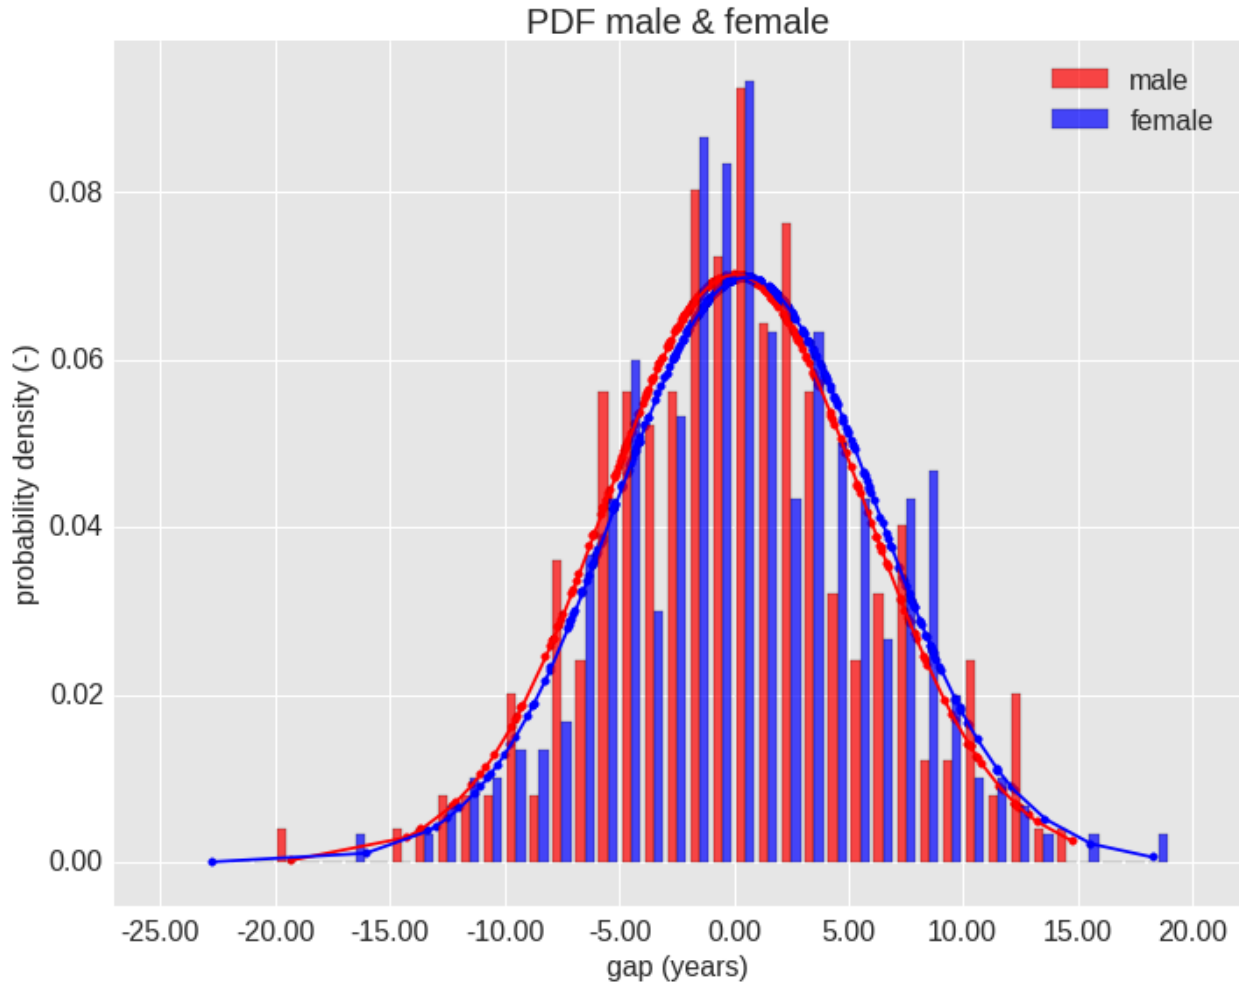

211

212 **Supplementary Figure 3.** The probability density of the gap value (PAD) for male and female  
 213 subjects. The distribution shows the difference in prediction for these two groups. Distributions  
 214 are similar as mean  $\eta_{\text{female}} = 0.51$  and variance  $\sigma^2_{\text{female}} = 5.72$  for female, whereas  $\eta_{\text{male}} = 0.04$  and  
 215  $\sigma^2_{\text{male}} = 5.69$  for male. Resulting t-test showed no significant difference between the two groups  
 216 as  $t(550) = -0.96$  and  $p = 0.34$ .

217

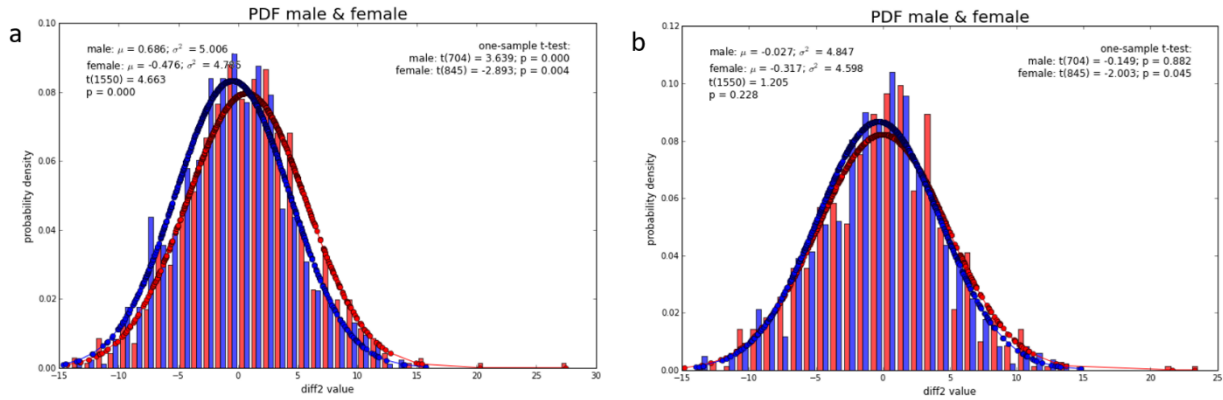

218

219 **Supplementary Figure 4.** Effect of adding sex as a covariate to the model on the gap value  
 220 distribution (red=male; blue=female). A comparison of the probability density functions for gap  
 221 of two early trained models along with their respective t-test results. Both models have the exact  
 222 same architecture with one the exception. a) Model uses only a single brain-MRI voxels input. b)  
 223 Model uses two inputs, i.e. brain-MRI voxels and respective sex. Models were trained under the  
 224 exact same settings.

225

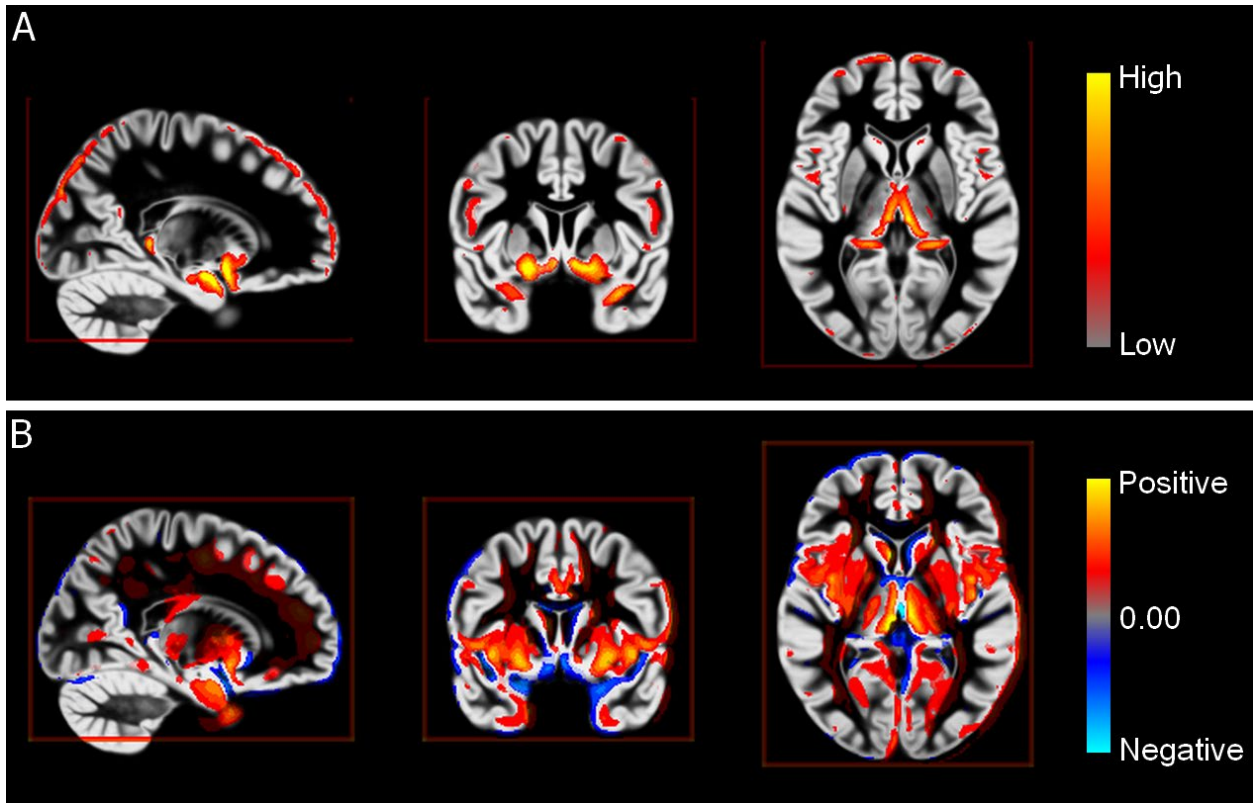

226

227 **Supplementary Figure 5.** Grad-CAM attention map and attention map change overlaid on a  
 228 brain template. **(A)** Grad-Cam attention map intensity per voxel. Voxel values in the attention  
 229 map have been set at 0.65 minimum threshold and capped at 0.95 maximum to exclude  
 230 background values and focus on more important regions. **(B)** Increase in attention map intensity  
 231 over chronological age per voxel. Map include only voxels with a significant increase in voxel  
 232 values ( $p < 3e^{-7}$  after Bonferroni correction by number of GM voxels).

233

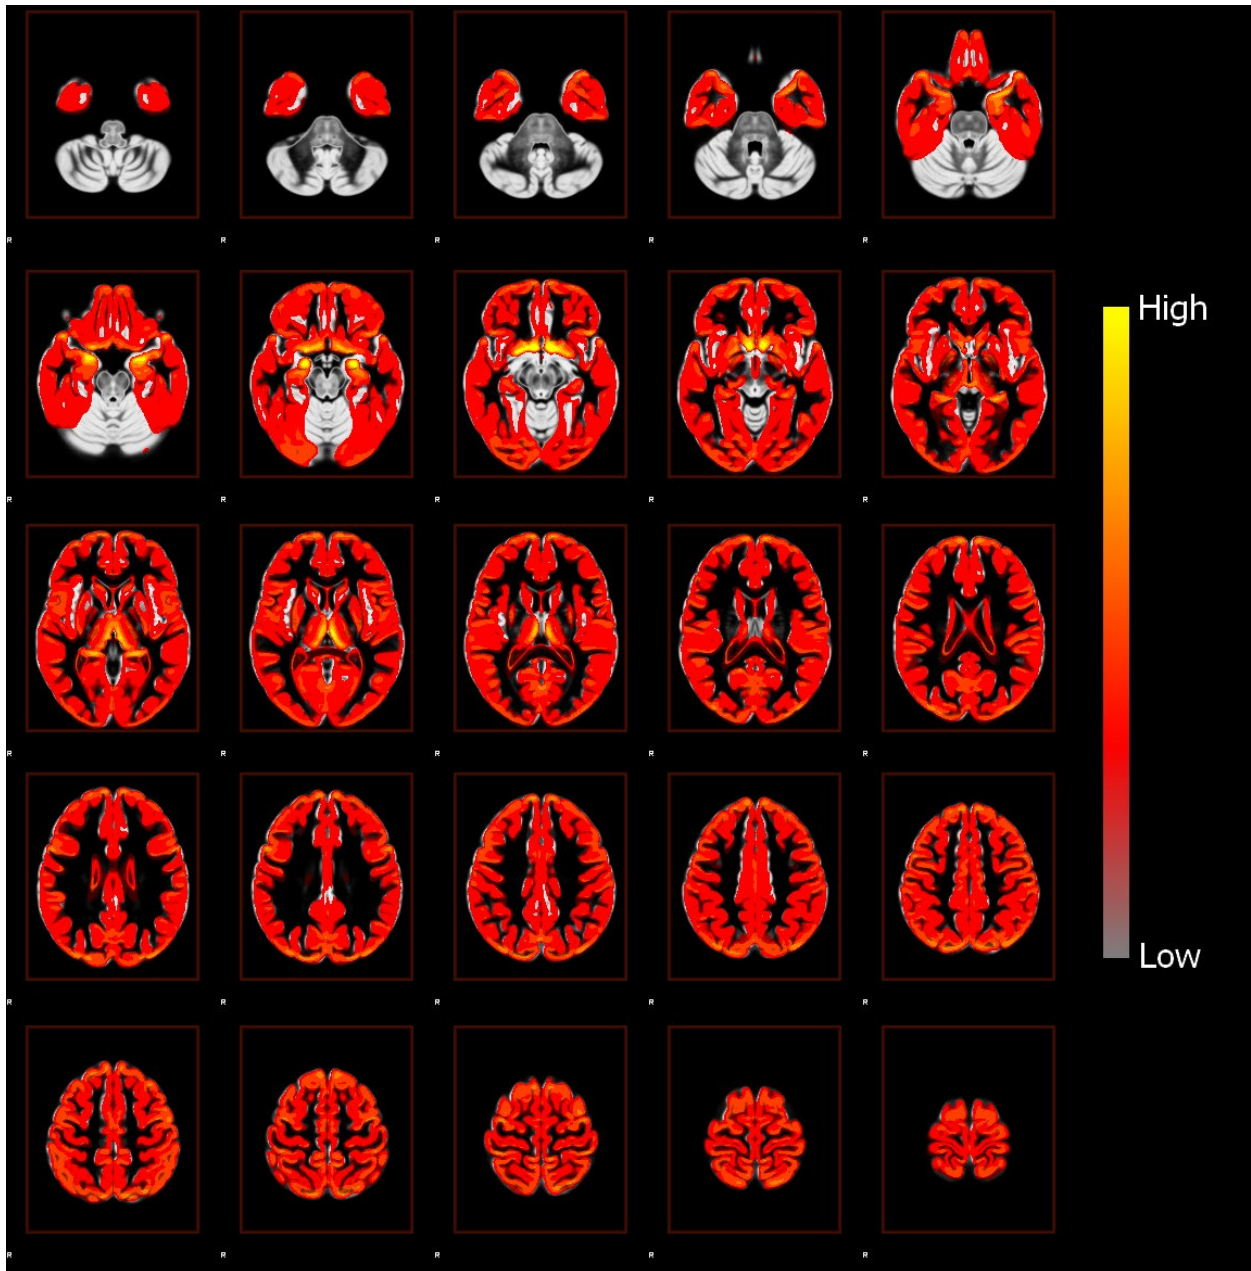

234

235 **Supplementary Figure 6.** Grad-CAM attention map intensity per voxel overlaid on a brain

236 template.

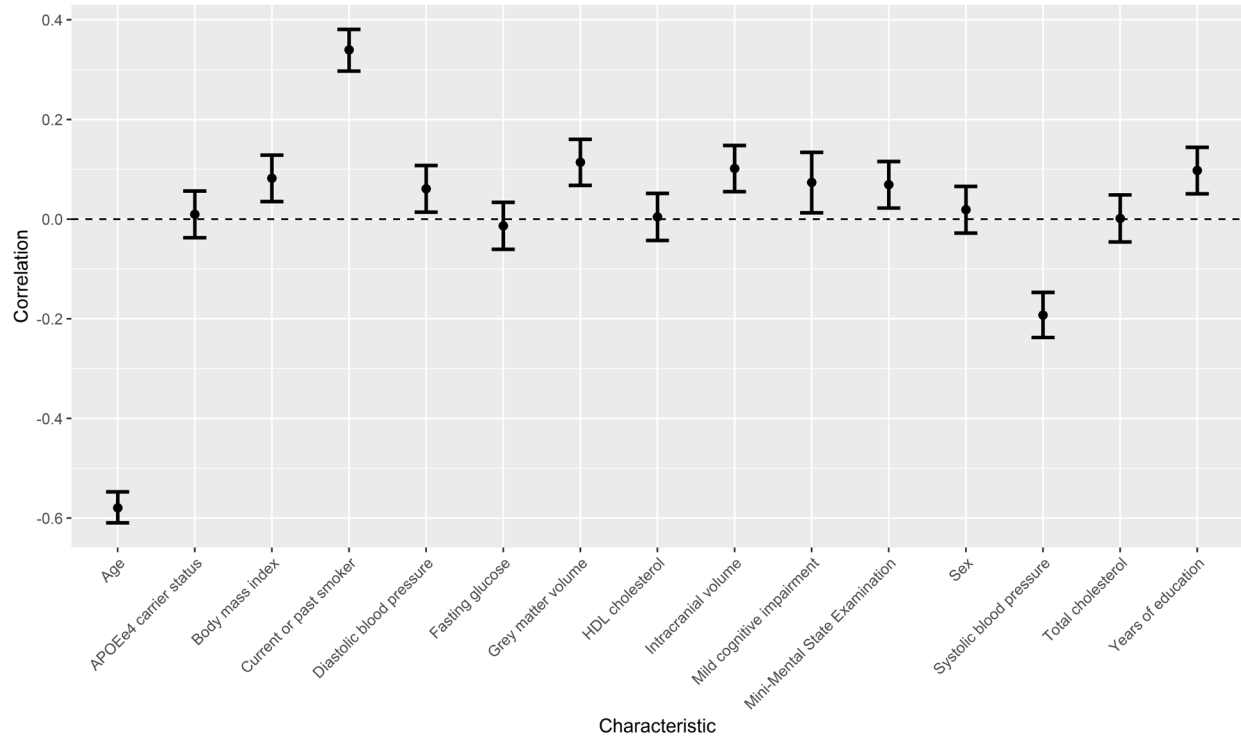

237  
238  
239

**Supplementary Figure 7.** Correlation between brain pathology associated features and the age gap.
